# Supplementary material for: Glycine Enhances Oxidative Stress Tolerance and Biocontrol Efficacy of Sporidiobolus pararoseus against Aspergillus niger Decay of Apples
Source: MDPI journal article supplement (doi:10.3390/foods12224121), 2023-11-14
Supplement: s1 [file s1]

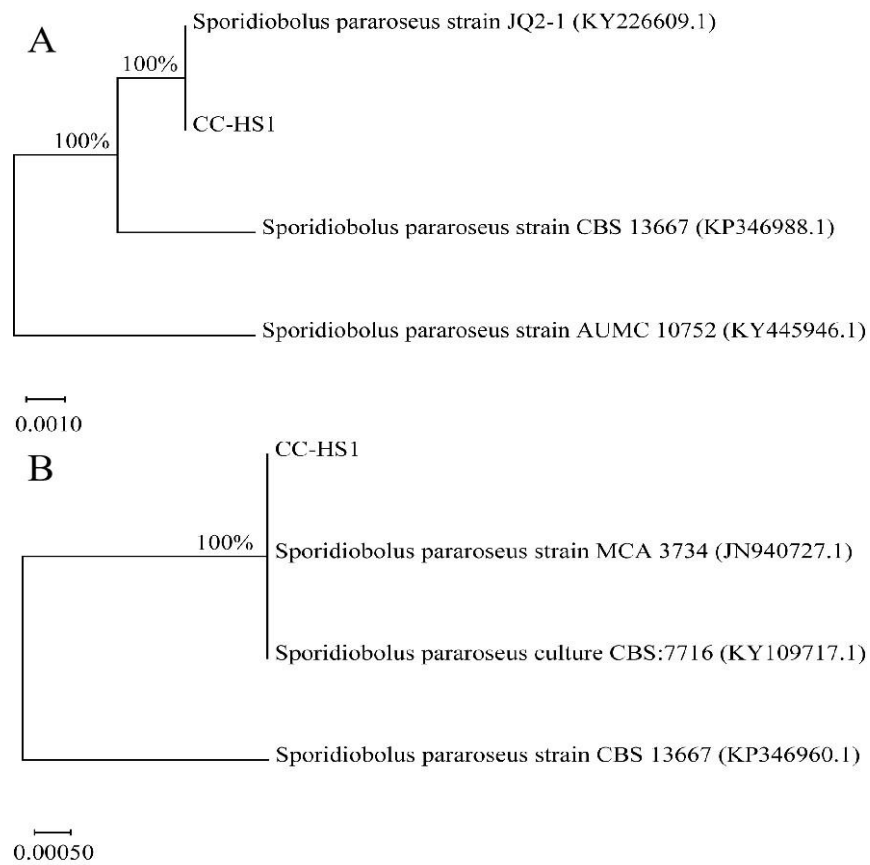

**Figure S1.** Phylogenetic analysis of CC-HS1 based on the D1/D2 domain of the 26S rDNA (A). Phylogenetic analysis of CC-HS1 based on the ITS region (B). The phylogenetic tree was constructed using MEGA X.
